# Supplementary material for: A homojunction–heterojunction–homojunction scaffold boosts photocatalytic H2evolution over Cd0.5Zn0.5S/CoO hybrids
Source: Royal Society of Chemistry journal article supplement (doi:10.1039/c9ta11915a), 2019-12-23
Supplement: c9ta11915a1.pdf [file c9ta11915a1.pdf]

*Electronic Supplementary Information for:*

A Homojunction-Heterojunction-Homojunction scaffold boosts  
photocatalytic H<sub>2</sub> evolution over Cd<sub>0.5</sub>Zn<sub>0.5</sub>S/CoO hybrids

*Haitao Zhao*<sup>a</sup>, *Luyan Guo*<sup>a</sup>, *Chuanwang Xing*<sup>a</sup>, *Heyuan Liu*<sup>c,\*</sup>, and *Xiyou Li*<sup>b,\*</sup>

a. College of Science, China University of Petroleum (East China), Qingdao, China,  
266580

b. School of Materials Science and Engineering, and State Key Laboratory of Heavy  
Oil Processing, China University of Petroleum (East China), Qingdao, China, 266580

c. Institute of New Energy, China University of Petroleum (East China), Qingdao,  
China, 266580

\* Correspondence to: Prof. X. Li at email: [xiyouli@upc.edu.cn](mailto:xiyouli@upc.edu.cn)

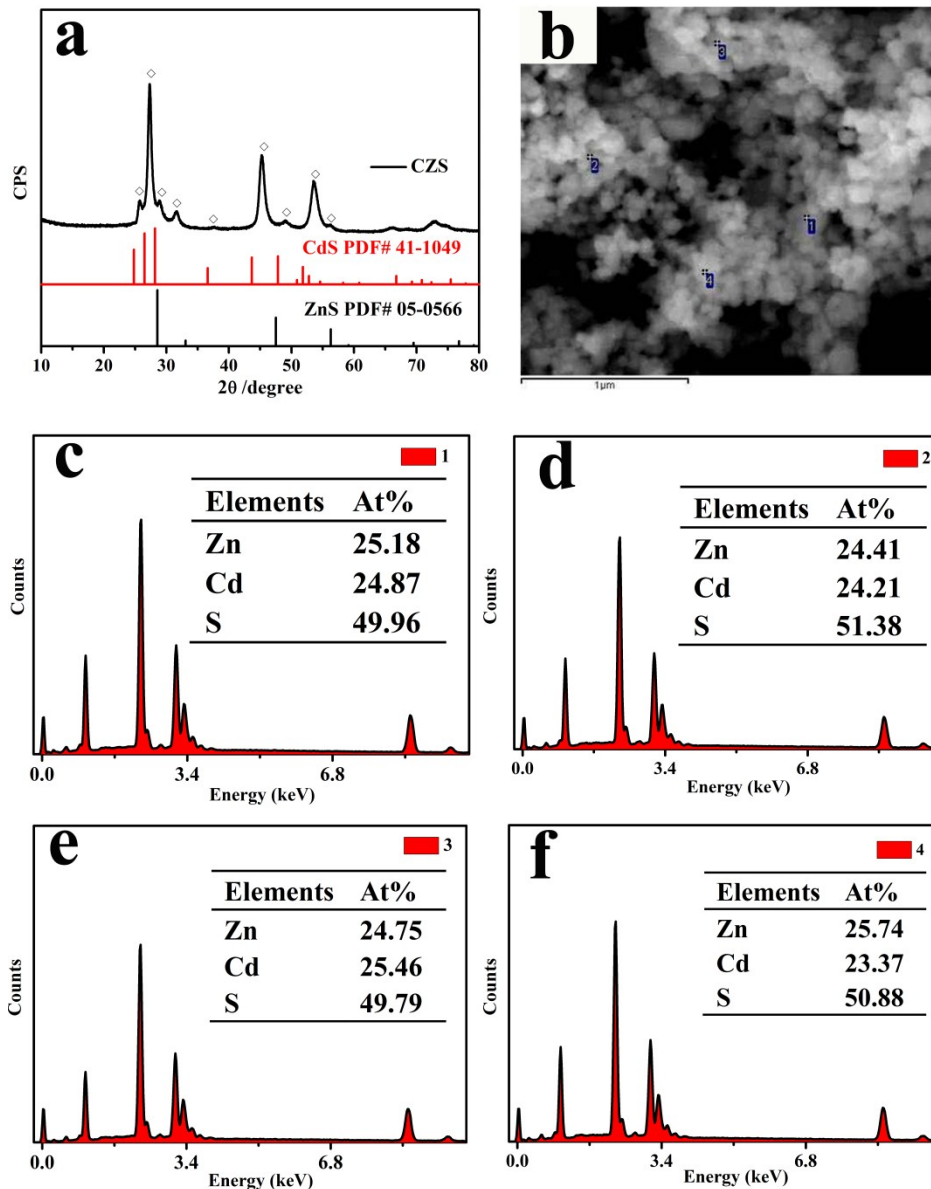

**Figure S1.** XRD pattern of CZS solid solution. The vertical lines at the top and bottom indicate CdS wurtzite structure (PDF #41-1049) and ZnS zinc blende structure (PDF #05-0566).

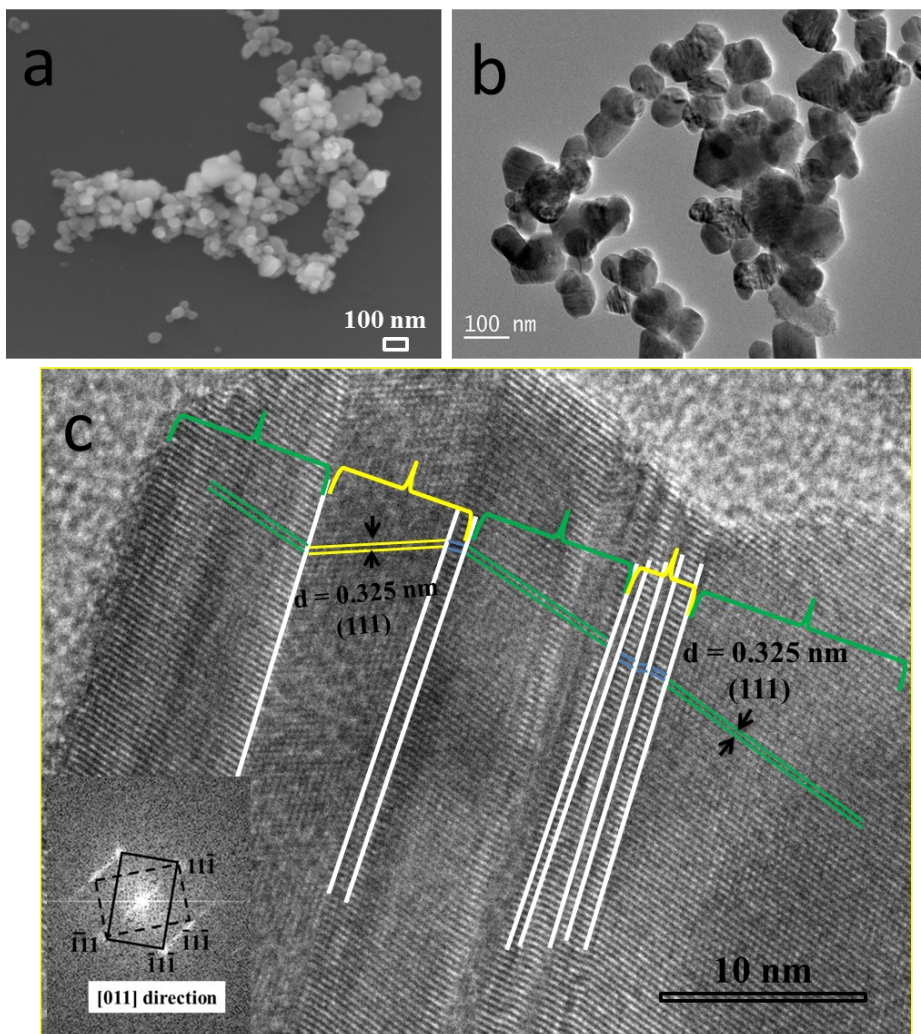

**Figure S2.** The SEM (a), TEM (b), HRTEM (c) and SAED (inset c) images of CZS.

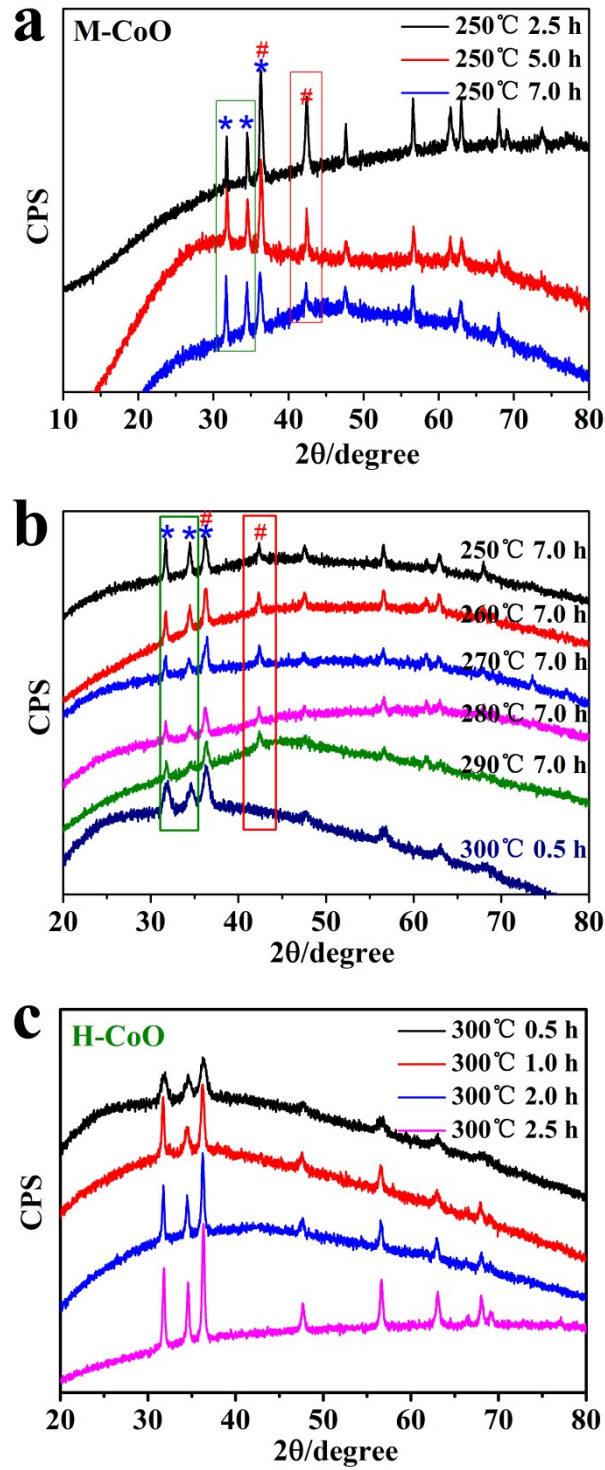

**Figure S3.** XRD patterns of M-CoO at 250°C for 2.5 h, 5 h,7 h (a), as prepared CoO at 250-290°C for 7 h and at 300°C for 0.5 h (b), H-CoO at 300°C for 0.5 h,1.0 h,2.0 h,2.5 h (c).

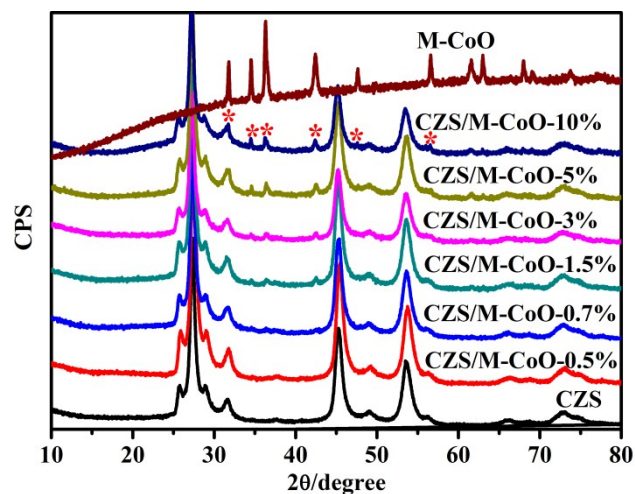

**Figure S4.** XRD patterns of CZS/M-CoO-x nanocomposites with variable M-CoO contents.

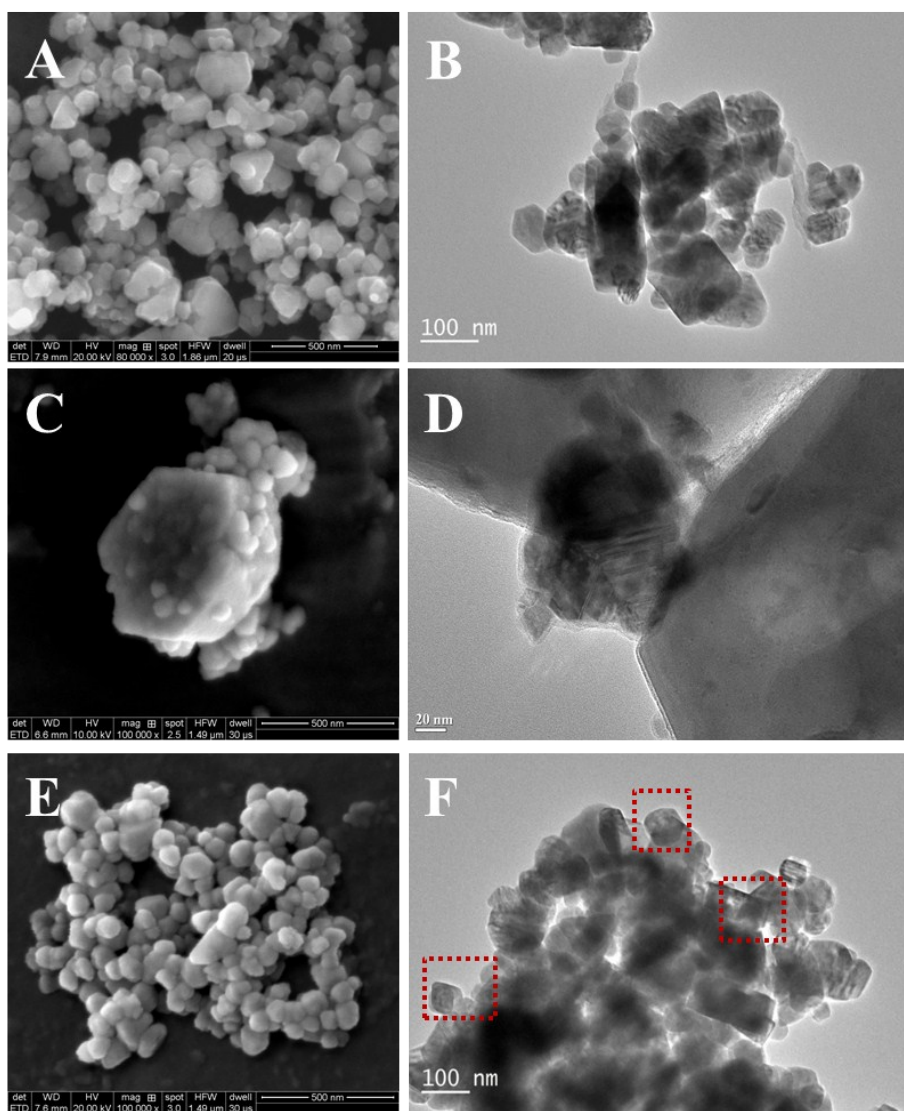

**Figure S5.** SEM and TEM images of CZS/C-CoO (A, B), CZS/H-CoO(C, D), CZS/M-CoO (E, F), respectively.

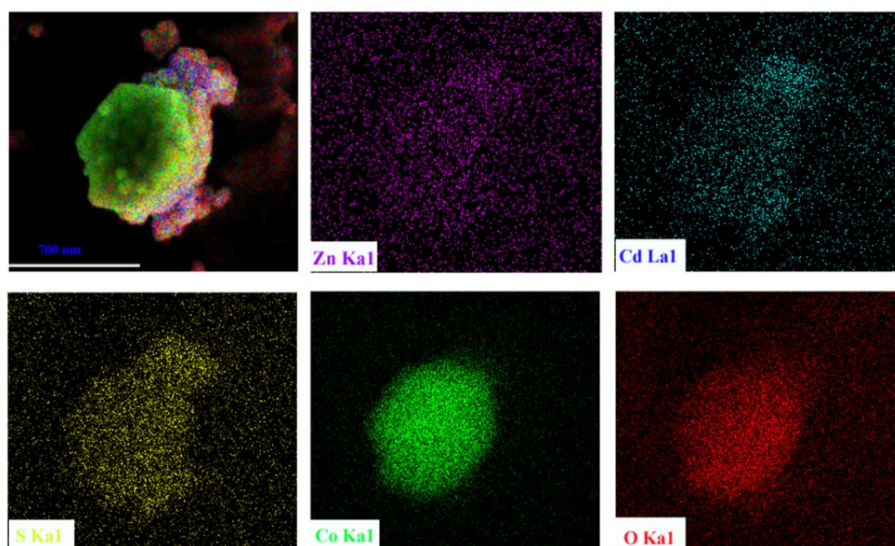

**Figure S6.** EDS mapping of CZS/H-CoO-10% nanocomposite.

**Table S1.** Comparisons of H<sub>2</sub> production rate of recently reported photocatalysts

| Photocatalysts                                                                          | Light Source            | Scavenger                                                       | H <sub>2</sub> rate (mmol/h) | Ref.      |
|-----------------------------------------------------------------------------------------|-------------------------|-----------------------------------------------------------------|------------------------------|-----------|
| 10 mg Twin CZS/M-CoO                                                                    | 300 W Xe lamp (>420 nm) | 0.35 M Na <sub>2</sub> S/0.25 M Na <sub>2</sub> SO <sub>3</sub> | 1.78                         | This work |
| 1 mg Zn <sub>0.5</sub> Cd <sub>0.5</sub> S/PdP <sub>-0.33</sub> S <sub>-1.67</sub>      | 300 W Xe lamp (>420 nm) | 0.75 M ascorbic acid                                            | 0.372                        | [29]      |
|                                                                                         |                         | 0.7 M Na <sub>2</sub> S/0.5 M Na <sub>2</sub> SO <sub>3</sub>   | 0.246                        |           |
| 30 mg Zn <sub>0.5</sub> Cd <sub>0.5</sub> S/Pt                                          | 500 W Xe lamp (>400 nm) | 0.1 M Na <sub>2</sub> S/0.1 M Na <sub>2</sub> SO <sub>3</sub>   | 0.114                        | [26]      |
| 5 mg Zn <sub>x</sub> Cd <sub>1-x</sub> S/CdS(2 at%)                                     | 300 W Xe lamp (>420 nm) | 0.35 M Na <sub>2</sub> S/0.25 M Na <sub>2</sub> SO <sub>3</sub> | 0.667                        | [61]      |
| 50 mg Zn <sub>0.5</sub> Cd <sub>0.5</sub> S/Ni <sub>0.1</sub> Co <sub>0.9</sub> P-4mol% | 300 W Xe lamp (>400 nm) | 0.35 M Na <sub>2</sub> S/0.25 M Na <sub>2</sub> SO <sub>3</sub> | 0.976                        | [62]      |
| 20 mg Zn <sub>0.5</sub> Cd <sub>0.5</sub> S@MoS <sub>2</sub> (10%)                      | 300 W Xe lamp (>420 nm) | 10 vol% Lactic acid                                             | 0.804                        | [63]      |
| 50 mg NiCo <sub>2</sub> O <sub>4</sub> /Zn <sub>0.1</sub> Cd <sub>0.9</sub> S           | 300 W Xe lamp (>400 nm) | 0.35 M Na <sub>2</sub> S/0.25 M Na <sub>2</sub> SO <sub>3</sub> | 1.72                         | [57]      |
| 10 mg NiCo <sub>2</sub> O <sub>4</sub> /CdS                                             | 5 W LED                 | 10 vol% Lactic acid                                             | 0.1098                       | [58]      |
| 25 mg MoO <sub>2</sub> -C/CdS                                                           | 300 W Xe lamp (>420 nm) | 10 vol% Lactic acid                                             | 0.402                        | [59]      |
| 50 mg CdS/CoO                                                                           | 300 W Xe lamp (>420 nm) | 20 vol% Lactic acid                                             | 0.0645                       | [60]      |
| 100 mg g-C <sub>3</sub> N <sub>4</sub> /CoO/Pt                                          | 300 W Xe lamp (>400 nm) | 10 vol% TEOA                                                    | 0.0651                       | [42]      |
| 40 mg CoO/C <sub>3</sub> N <sub>4</sub> NTs                                             | 300 W Xe lamp (>420 nm) | 10 vol% TEOA                                                    | 0.0105                       | [43]      |
| 40 mg CdS/CoO <sub>x</sub>                                                              | 350 W Xe lamp (>420 nm) | 0.35 M Na <sub>2</sub> S/0.25 M Na <sub>2</sub> SO <sub>3</sub> | 0.14                         | [46]      |
| 35 mg CoO <sub>x</sub> /TiO <sub>2</sub> /Pt                                            | UV-light                | 15 vol% Methanol                                                | 0.276                        | [74]      |

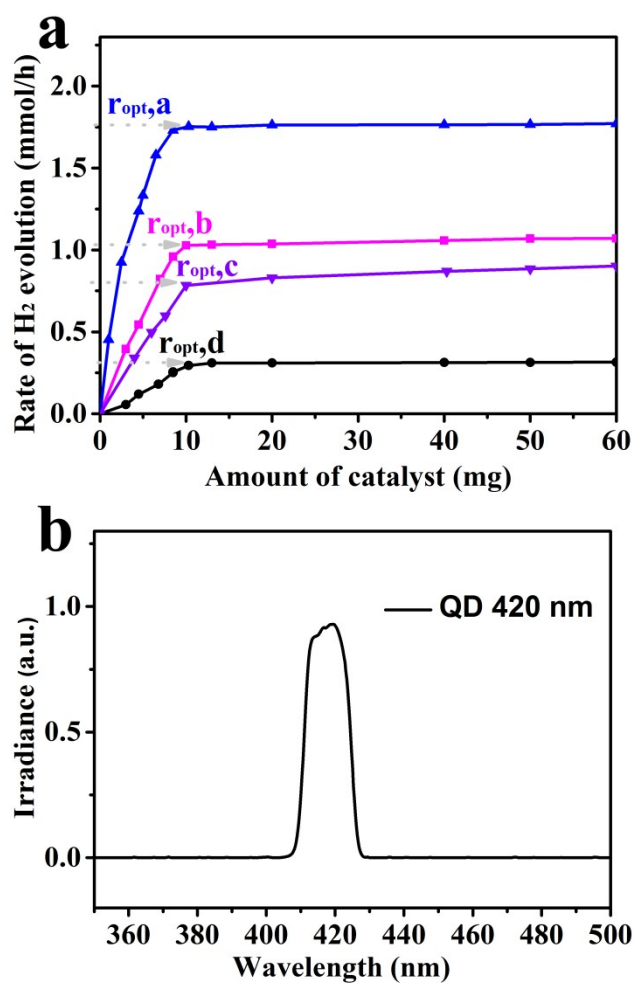

**Figure S7.** (a) Rate of H<sub>2</sub> evolution with different amount of photocatalysts over a: CZS/M-CoO-1.5%, b: CZS/C-CoO-1.5%, c: CZS/H-CoO-1.5%, d: CZS. (b) Relative light intensity of 300 W Xe lamp with bandpass filter 420 nm.

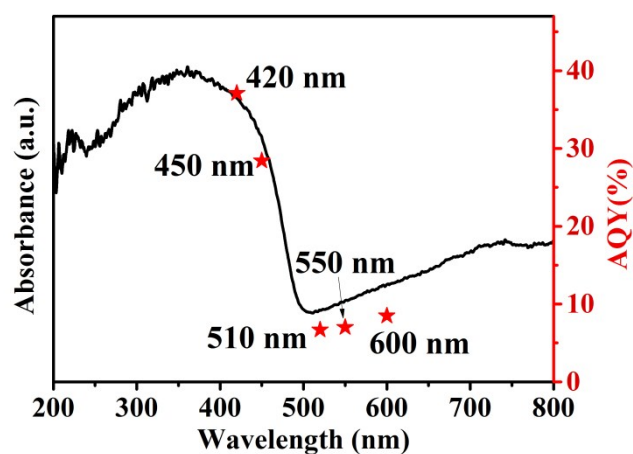

**Figure S8.** Wavelength dependent AQY of H<sub>2</sub> evolution for 10 mg of CZS/M-CoO-1.5%.



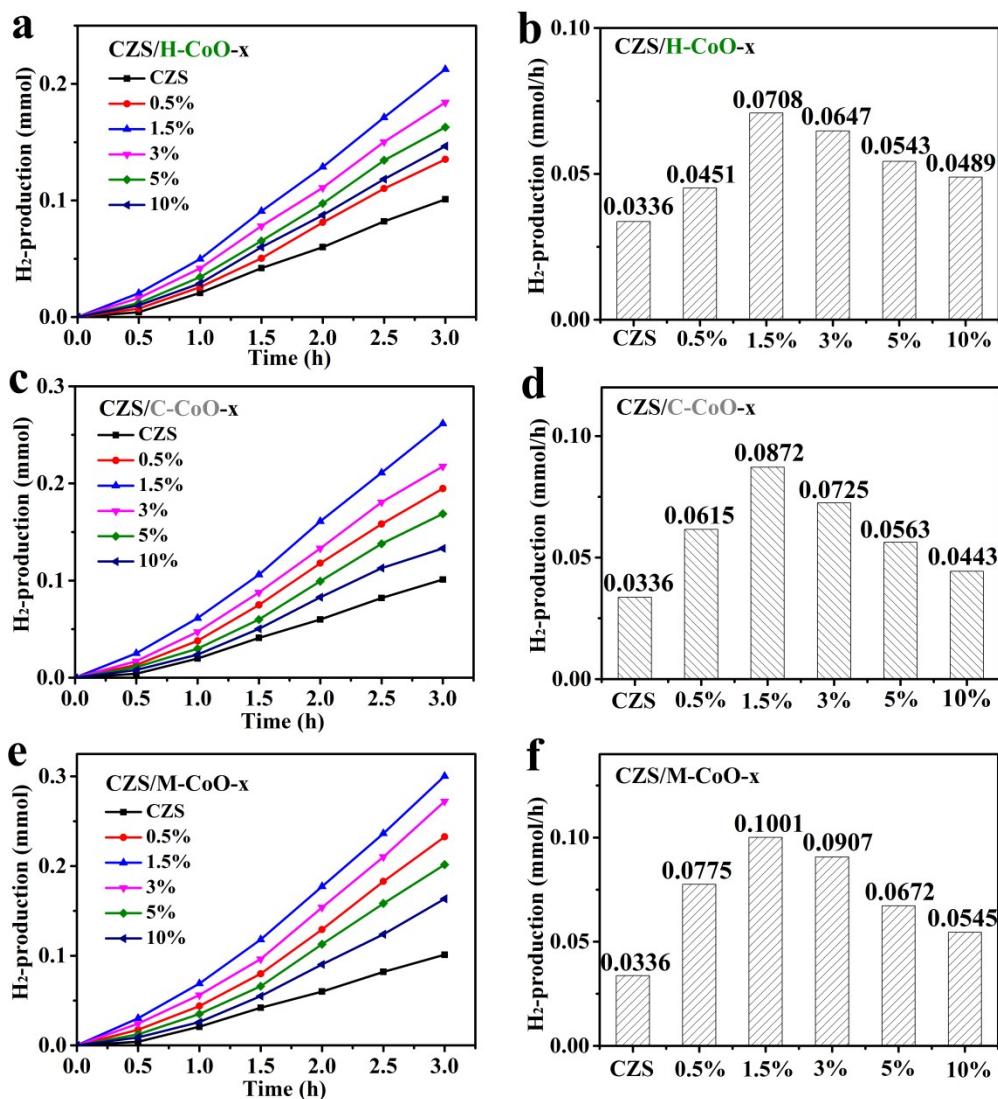

**Figure S9.** Photocatalytic H<sub>2</sub> generation curves for samples in 0.35 M Na<sub>2</sub>S/0.25 M Na<sub>2</sub>SO<sub>3</sub> aqueous solution under  $\lambda > 510$  nm irradiation, 10 mg of photocatalysts.

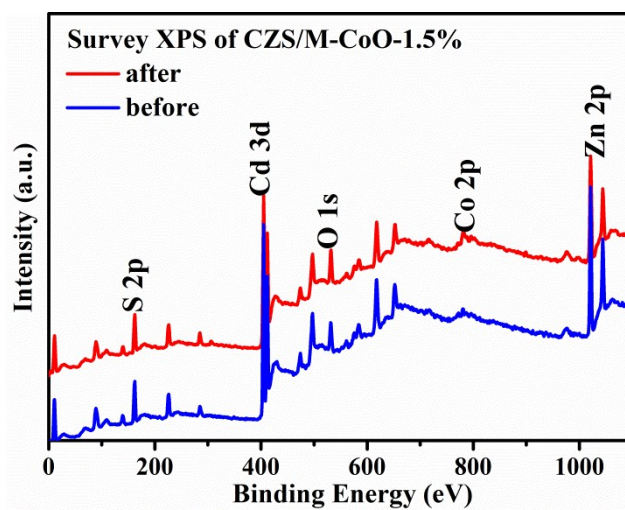

**Figure S10.** XPS survey spectra obtain before and after photocatalysis over CZS/M-CoO-1.5%.

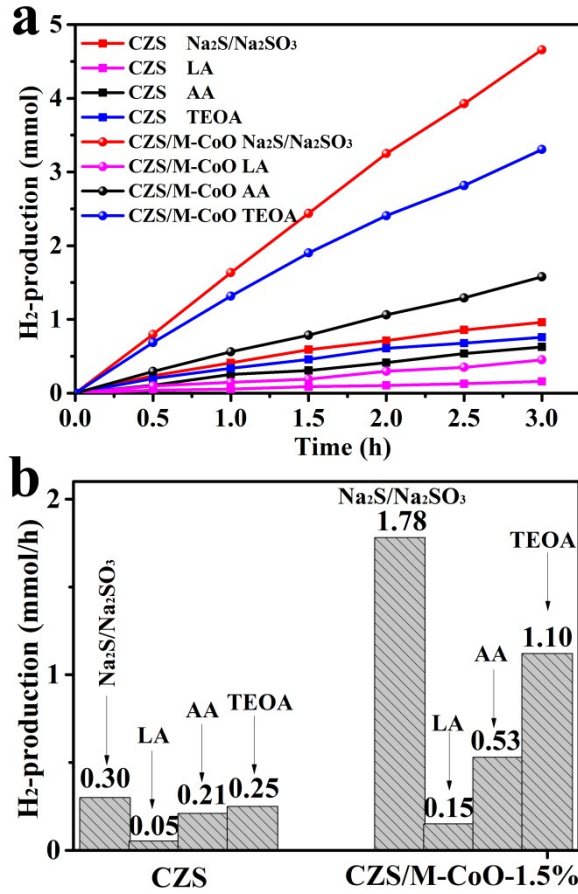

**Figure S11.** Photocatalytic HER activities of CZS/M-CoO-1.5% and CZS measured with different hole scavengers.

**According to the following equations (S1):**

$$\begin{aligned}
 AQY(\%) &= \frac{\text{Number of reacted electrons}}{\text{Number of incident photons}} \times 100\% \\
 &= \frac{M \times N_A \times 2}{\frac{P \times t}{E_g \times J}} \times 100\% \\
 &= \frac{\text{Number of evolved } H_2 \text{ molecules} \times 2}{\text{Number of incident photons}} \times 100\%
 \end{aligned}$$

Where  $N_A = 6.02 \times 10^{23}$ ,  $I$  (light intensity) = 0.160 J/s,  $E_g = 1240/\lambda$  ( $\lambda = 420$  nm),  $t$  (Time) = 3600 s,  $J = 1.6 \times 10^{-19}$  j.

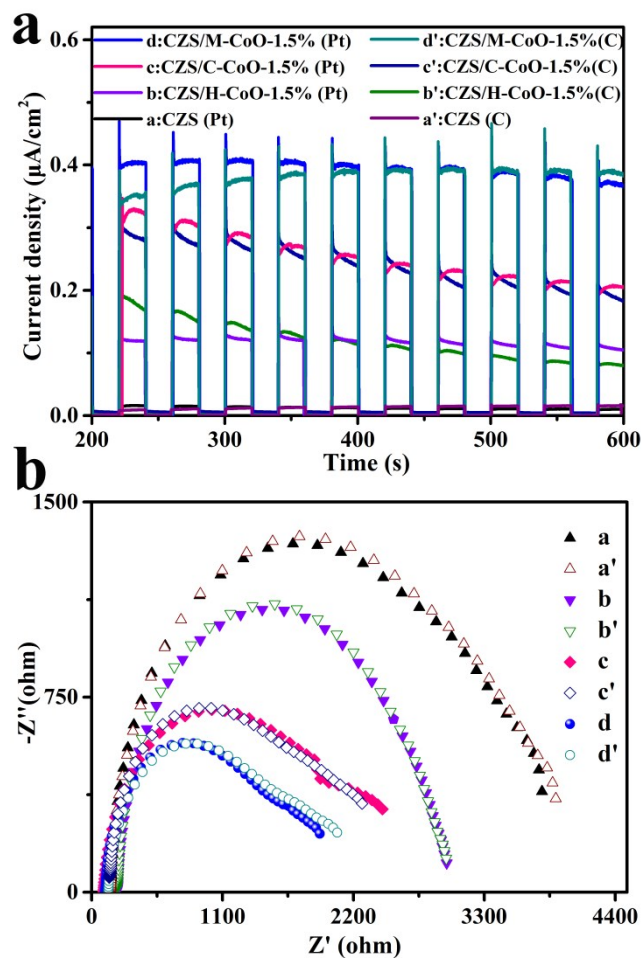

**Figure S12.** (a) Transient photocurrents, (b) Nyquist plots of electrochemical impedance spectra for pristine CZS, CZS/C-CoO-1.5%, CZS/H-CoO-1.5% and CZS/M-CoO-1.5%, using a Pt sheet and carbon rod as counter electrode, respectively.

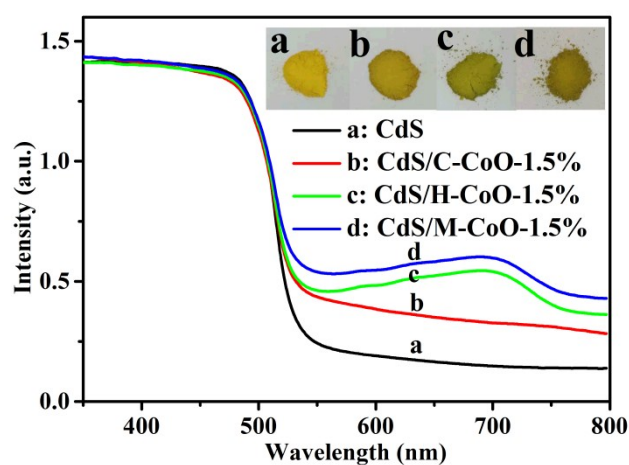

**Figure S13.** UV-Vis diffuse reflectance spectra of samples. The inset shows colors of samples.

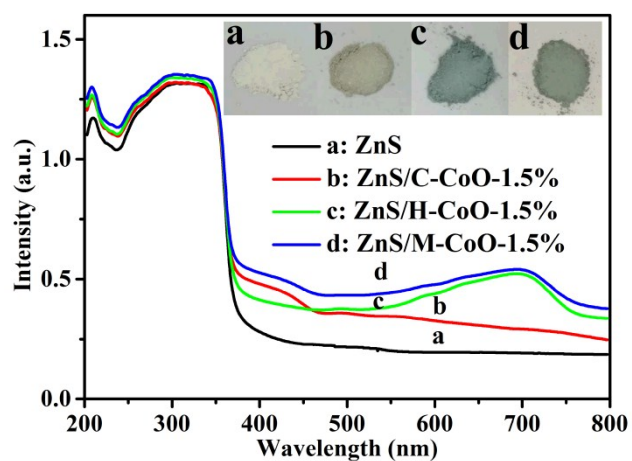

**Figure S14.** UV-Vis diffuse reflectance spectra of samples. The inset shows colors of samples.

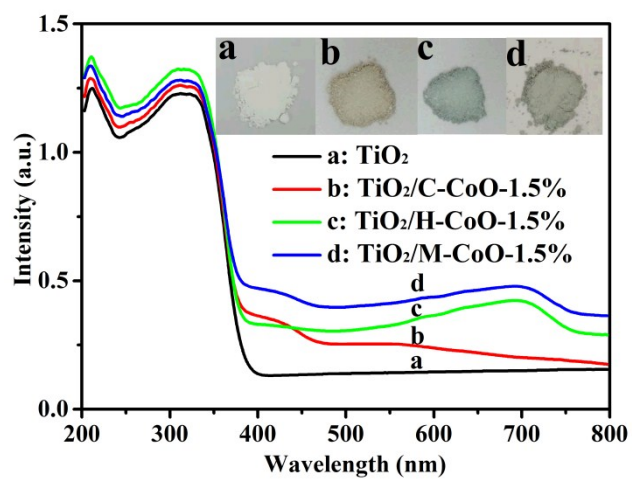

**Figure S15.** UV-Vis diffuse reflectance spectra of samples. The inset shows colors of samples.

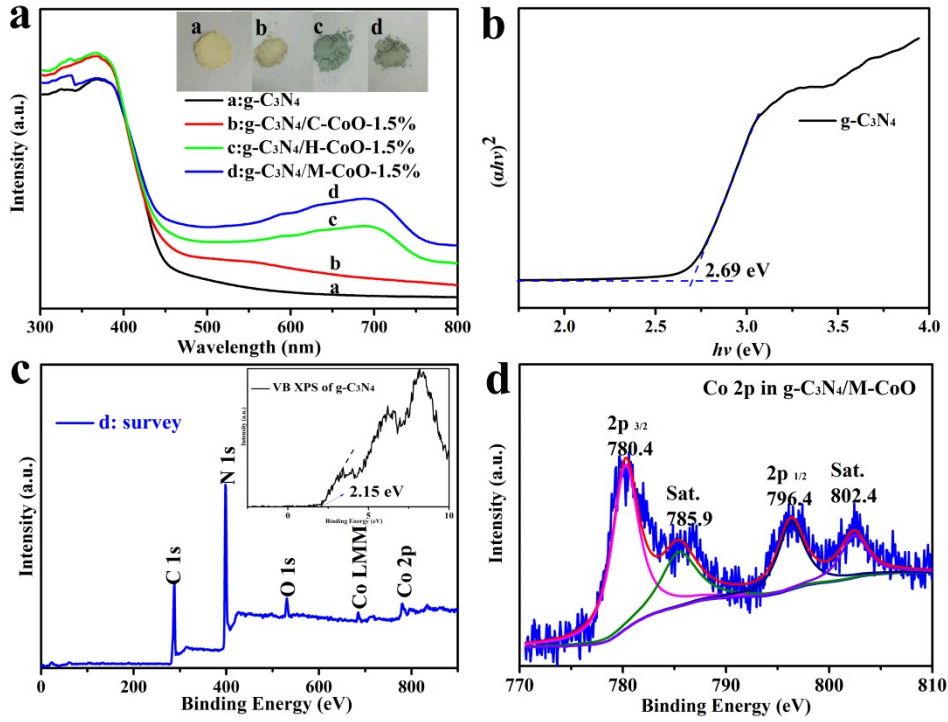

**Figure S16.** (a) UV-Vis diffuse reflectance spectra of sample. The inset shows the color of samples. (b) The E<sub>g</sub> of g-C<sub>3</sub>N<sub>4</sub>. (c) XPS survey scan of g-C<sub>3</sub>N<sub>4</sub>/M-CoO (inset shows VB XPS of g-C<sub>3</sub>N<sub>4</sub>). (d) The high-resolution of Co 2p in g-C<sub>3</sub>N<sub>4</sub>/M-CoO.
